# Supplementary material for: Engineered Illumination Devices for Optogenetic Control of Cellular Signaling Dynamics
Source: PubMed Central journal article supplement — Cell Rep. Author manuscript; Available in PMC 2022 Aug 7. (PMC9357365; doi:10.1016/j.celrep.2020.107737), 2020-06-09
Supplement: NIHMS1603421-supplement-1.pdf [file NIHMS1603421-supplement-1.pdf]

**Cell Reports, Volume 31**

**Supplemental Information**

**Engineered Illumination Devices for Optogenetic**

**Control of Cellular Signaling Dynamics**

**Nicole A. Repina, Thomas McClave, Hunter J. Johnson, Xiaoping Bao, Ravi S. Kane, and David V. Schaffer**

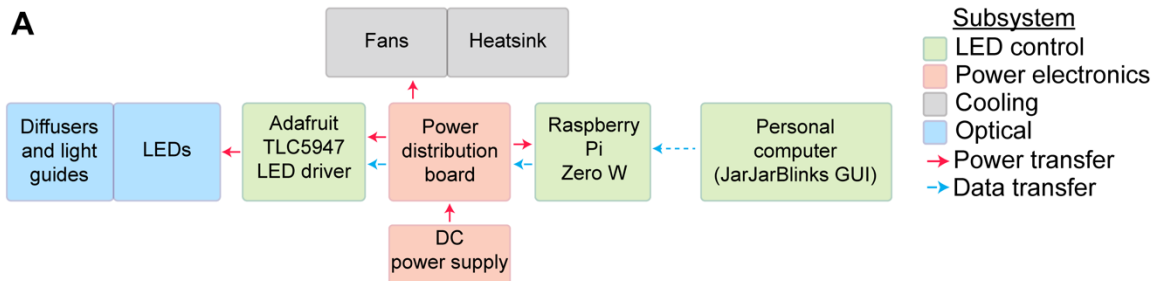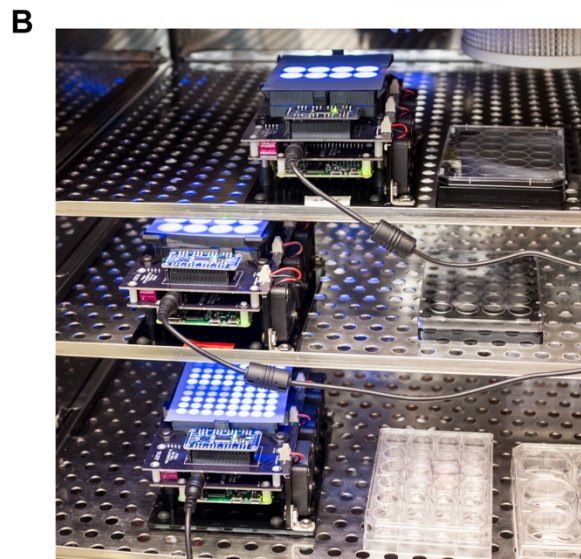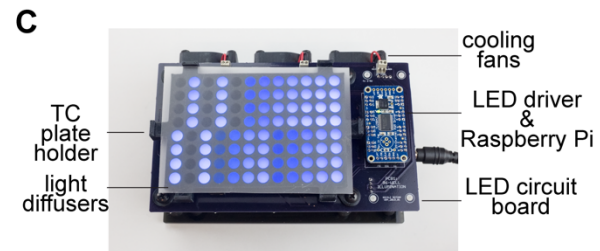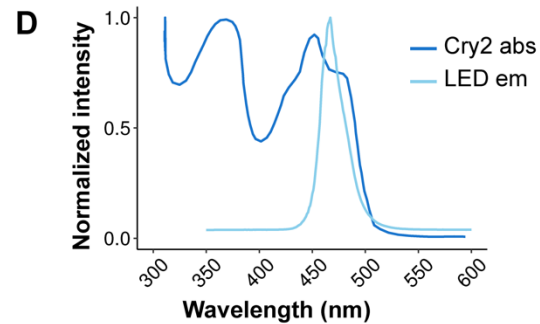

**E**

LED Controller

Plate Type: 24 Plate Well, 96 Plate Well

Overview (LED Preview)

Intensity / PWM Conversion:  $I_{pwm}/max(x_{pwm}) = mx_{pwm} + b$

Interface Information: Duty cycle (%) = Percent time "on" per period. Period (s) = Length of blink cycle. E.g. For 100ms blinks with 900ms pause, set duty cycle to 10% and period to 1s.

Function sample rate: 5 Hz. Blink signal deteriorates below 10 ms pulse width.

Board Specifications: -24/96 Plate Well, -Raspberry Pi Zero W with Raspbian Stretch, -Adafruit TLC5947 LED Driver

| Channel    | Class | Offset | Blink | Pulse | $I \left( \frac{\mu W}{mm^2} \right)$ | $I_{min}$ | $I_{max}$ | Duty cycle (%) | Period (s) |
|------------|-------|--------|-------|-------|---------------------------------------|-----------|-----------|----------------|------------|
| Channel A1 |       |        |       |       | 0                                     | 0         | 10        | 50             | 2          |
| Channel A2 |       |        |       |       | 0.8                                   |           |           |                |            |
| Channel A3 |       |        |       |       | 1                                     | 5         | 10        |                | 10000      |
| Channel A4 |       |        |       |       |                                       |           |           |                |            |
| Channel A5 |       |        |       |       | 5                                     |           |           |                |            |
| Channel A6 |       |        |       |       | 0.2                                   |           |           |                |            |
| Channel B1 |       |        |       |       | 0.1                                   |           |           |                |            |
| Channel B2 |       |        |       |       |                                       |           |           |                |            |
| Channel B3 |       |        |       |       |                                       |           |           |                |            |
| Channel B4 |       |        |       |       |                                       |           |           |                |            |
| Channel B5 |       |        |       |       | 0                                     | 2         | 1         | 10             |            |
| Channel B6 |       |        |       |       |                                       |           |           |                |            |
| Channel C1 |       |        |       |       |                                       |           |           |                |            |
| Channel C2 |       |        |       |       |                                       |           |           |                |            |
| Channel C3 |       |        |       |       | 0.5                                   |           |           |                |            |
| Channel C4 |       |        |       |       | 10                                    |           |           |                |            |
| Channel C5 |       |        |       |       |                                       |           |           |                |            |
| Channel C6 |       |        |       |       | 0                                     | 2         | 2         | 10             |            |
| Channel D1 |       |        |       |       | 0                                     | 2         | 2         | 10             |            |
| Channel D2 |       |        |       |       |                                       |           |           |                |            |
| Channel D3 |       |        |       |       | 0.5                                   |           |           |                |            |
| Channel D4 |       |        |       |       |                                       |           |           |                |            |
| Channel D5 |       |        |       |       |                                       |           |           |                |            |
| Channel D6 |       |        |       |       |                                       |           |           |                |            |

Submit and Upload!

**G**

File

Plate Type: 24 Plate Well, 96 Plate Well

Overview (LED Preview)

**F**

Channel B1 Function

m: .01 b: 0 t(seconds) <= 400

A: 1 B: .04 C: 4 400 < t(seconds) <= 1000

New Linear Function: [mx+b]

m: .1 b: .3 t(seconds) <= 30000 Add Linear

New Sinusoidal Function: [A sin(Bt) + C]

A: B: C: t(seconds) <= Add Sine

Remove Previous

1  
2

**Supplementary Figure S1. Overview of 24-well and 96-well LAVA devices. Related to Figure**

3 1. **a)** System block diagram of LAVA device. **b)** Image of 24-well and 96-well LAVA devices in  
4 TC incubator. **c)** Image of assembled 96-well LAVA board, with optical, cooling, and electronic  
5 subsystems highlighted. **d)** Emission spectrum of 470 nm blue LEDs match the absorption  
6 spectrum of Cry2. Cry2 spectrum adapted from reference (Banerjee et al. 2007). **e)** Screenshot  
7 of GUI under 24-well TC plate setting. **f)** Screenshot of dialog box for input of time-varying light  
8 patterns as piecewise functions. **g)** Screenshot of GUI under 96-well TC plate setting.

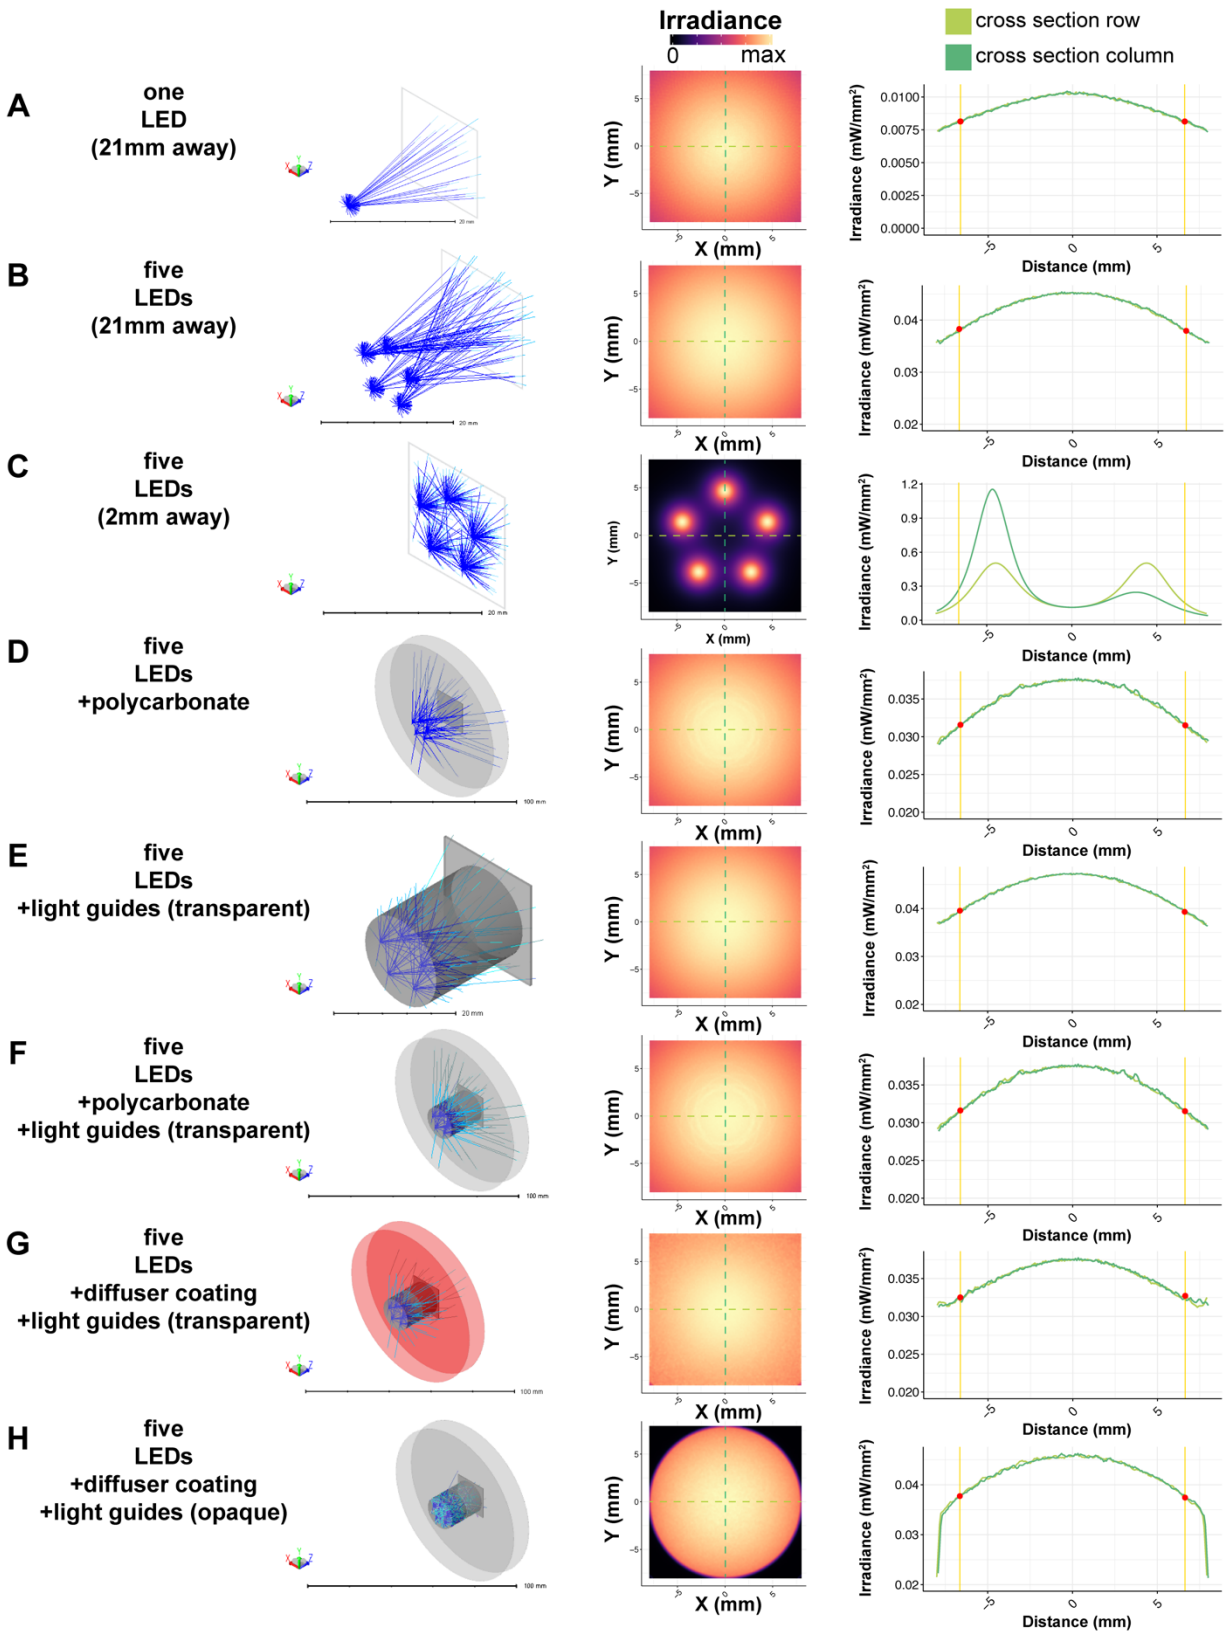

11 Schematic of LED configuration (left), modeling result at detector plane (middle), and column  
12 and row cross-sections (right) with well edge of 24-well plate indicated with red points. **a)** Single  
13 LED illuminating detector 21mm away. **b)** Five LEDs, distributed along 1cm diameter circle,  
14 illuminating detector 21mm away. **c)** Five LEDs illuminating detector 2mm away. **d)** Five LEDs  
15 illuminating detector 21mm away through two 0.01" thick sheets of polycarbonate. **e)** Five LEDs  
16 illuminating detector 21mm away through two 10mm transparent light guides. **f)** Five LEDs  
17 illuminating detector 21mm away through two 0.01" thick sheets of polycarbonate and two  
18 10mm transparent light guides. **g)** Five LEDs illuminating detector 21mm away through two  
19 0.01" thick sheets of polycarbonate with 80° diffuser coating and two 10mm transparent light  
20 guides. **h)** Five LEDs illuminating detector 21mm away through two uncoated 0.01" thick sheets  
21 of polycarbonate and two 10mm reflective light guides with Lambertian scattering.

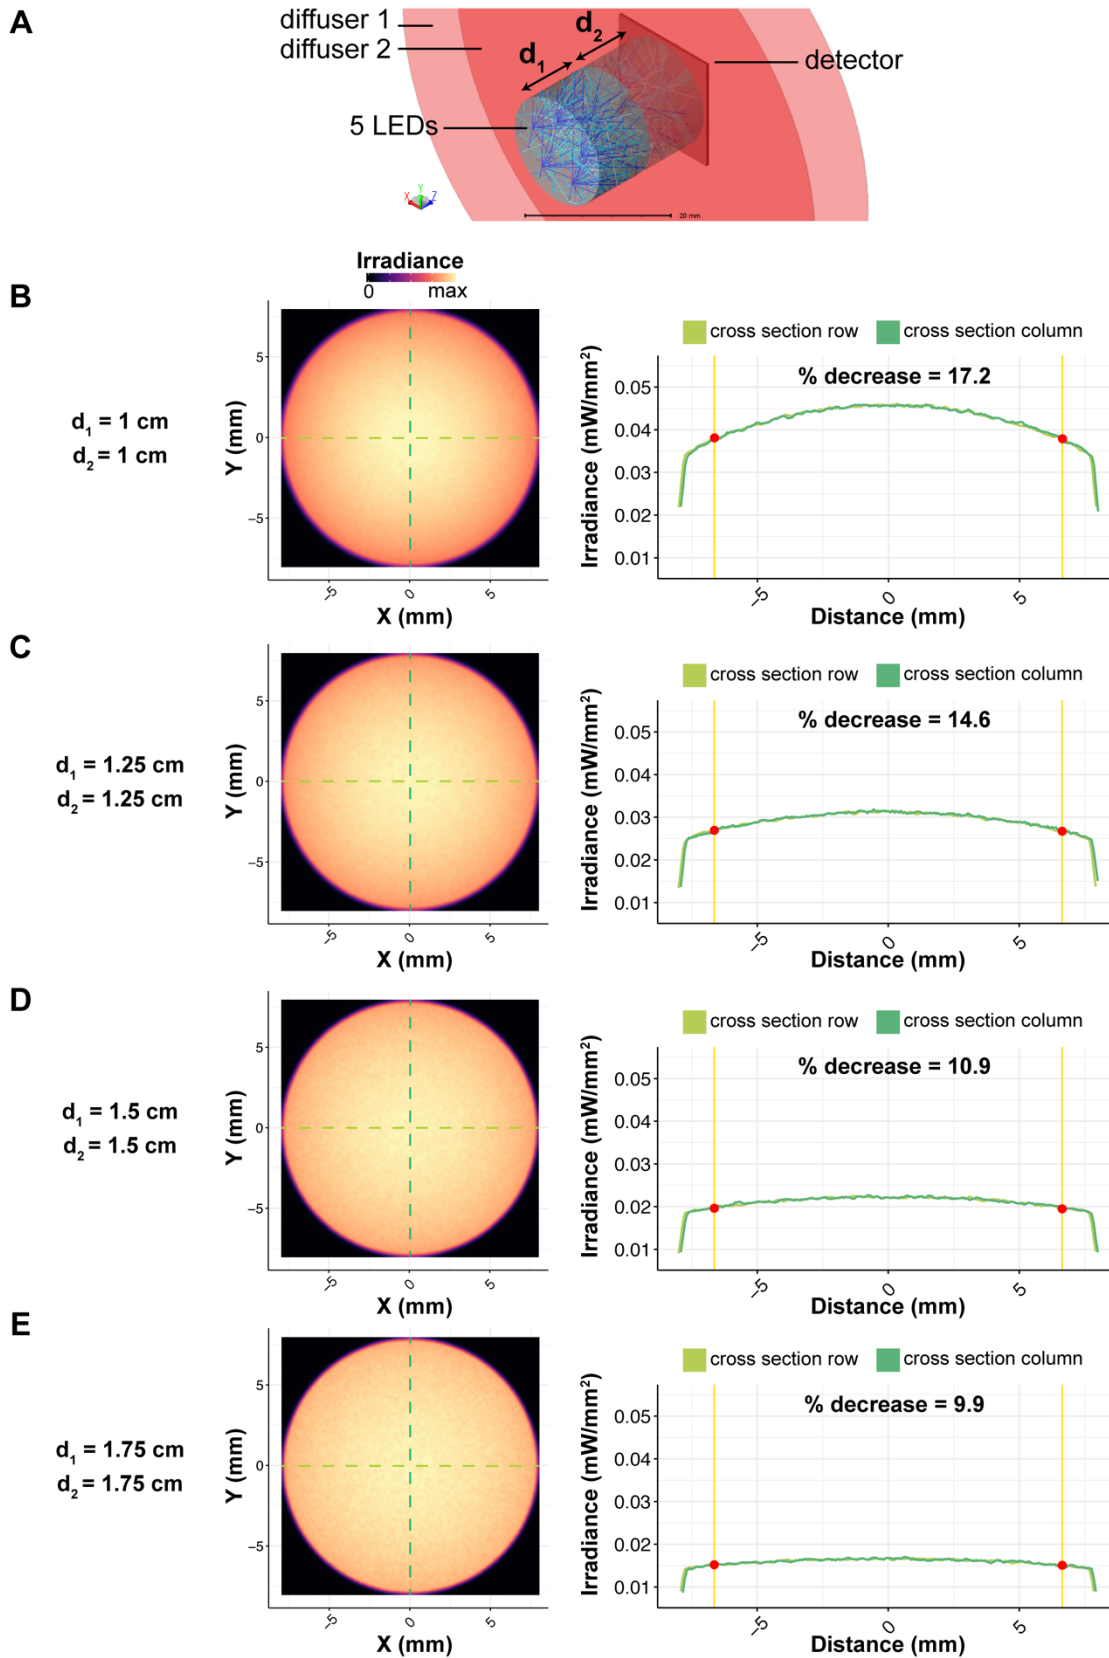

24 and  $d_2$ . Related to Figure 2. **a)** Schematic of modeling setup. Five LEDs illuminate detector  
25 through two 0.01" thick sheets of polycarbonate with 80° diffuser coating (red) and two reflective  
26 light guides with Lambertian scattering (grey cylinder). **b-e)** Modeling results at indicated values  
27 of  $d_1$ ,  $d_2$ . Image at detector plane (left) and column and row cross-sections (right) with well edge  
28 of 24-well plate indicated with red points show improved illumination uniformity at expense of  
29 light intensity with increasing light guide thickness.

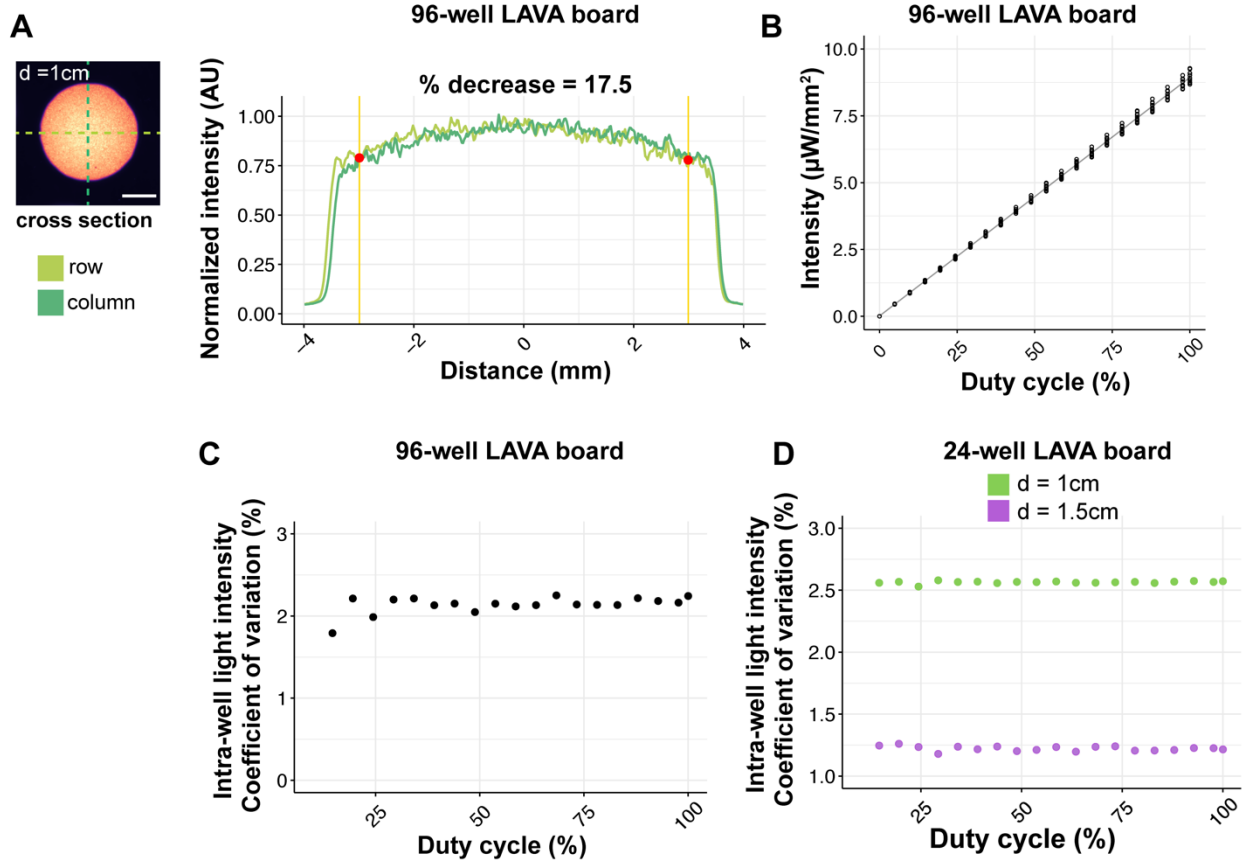

30  
 31 **Supplementary Figure S4.** Intensity characterization of 24-well and 96-well LAVA boards.  
 32 Related to Figure 2. **a)** Brightfield images of well (left) and graph of intensity linescans along  
 33 indicated cross-sections (right) characterize the intensity uniformity of the 96-well LAVA board  
 34 when  $d = 1\text{ cm}$ . Percent decrease is calculated between intensity at center of well and intensity  
 35 at highlighted red point, which indicates location of well edge of a 96-well culture plate. Graph  
 36 shows mean normalized intensity over 2 independent wells. Scale bar 2.5 mm. **c)** Measured  
 37 light intensity in response to the programmed duty cycle of the LED pulse-width modulation  
 38 signal. Graph shows measured intensity from wells of a 96-well LAVA board and curve fit to a  
 39 linear regression model. **d)** Coefficient of variation of light intensity between the 24 independent  
 40 light channels of a 96-well LAVA device measured at different programmed intensities. **e)**  
 41 Coefficient of variation of light intensity between the 24 independent light channels of a 24-well  
 42 LAVA device measured at different programmed intensities. Green points correspond to optical  
 43 configuration with  $d = 1\text{ cm}$ , violet points show optical configuration with  $d = 1.5\text{ cm}$ .



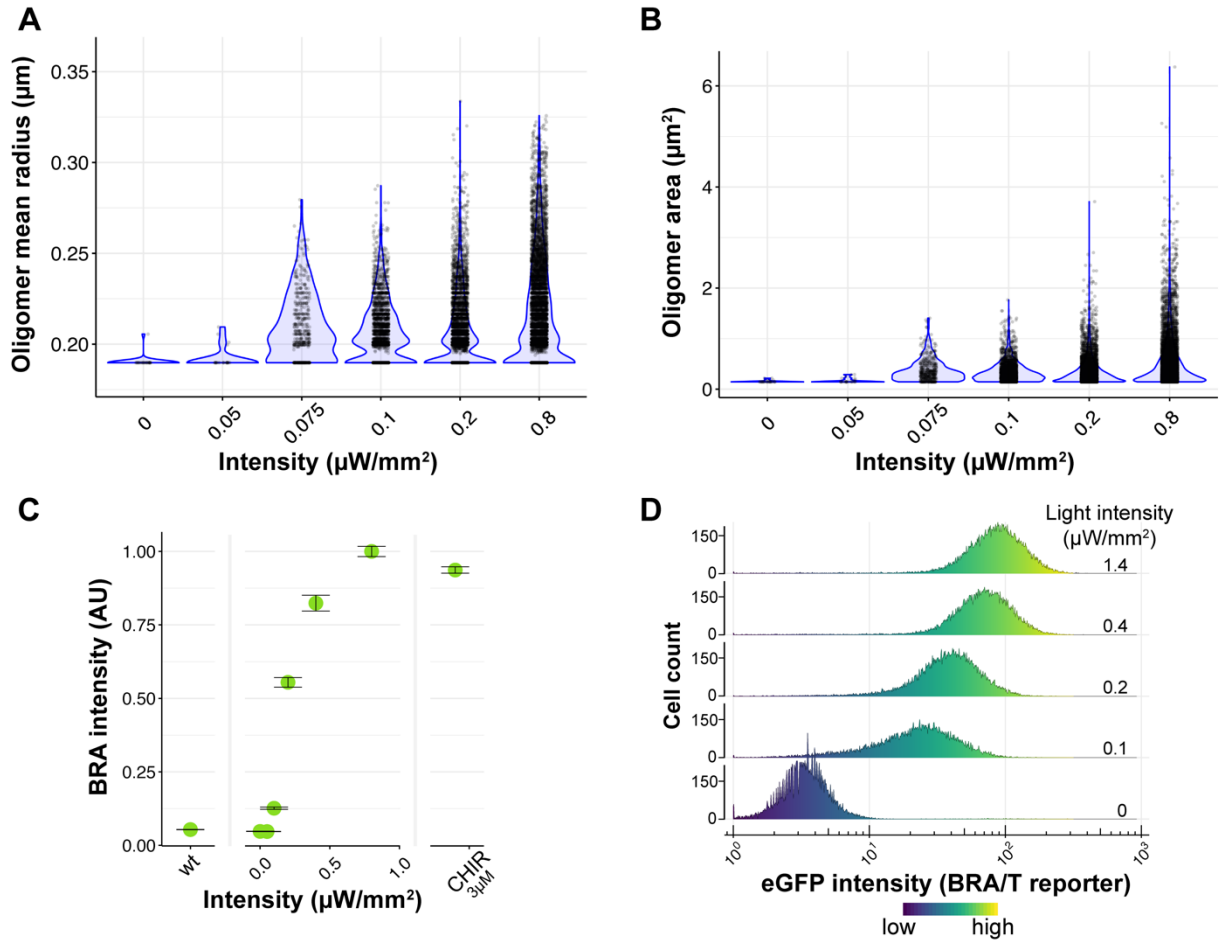

44

45 **Supplementary Figure S5.** LRP6 oligomer size and BRA expression in optoWnt cells is dose-  
 46 responsive to light intensity. Related to Figure 4. **a-b)** Quantification of LRP6 oligomer size from  
 47 immunostaining of optoWnt hESCs illuminated at indicated light intensities for 1 hr. Each point  
 48 represents an LRP6 oligomer, with > 100 cells analyzed per condition. **c)** Quantification BRA  
 49 immunostaining in response to increasing light intensity after 24 hr illumination or 3  $\mu\text{M}$  CHIR  
 50 treatment. Average BRA intensity per hESC was calculated for each biological replicate. Graph  
 51 shows mean of biological replicates  $\pm$  1 s.d., n = 3 replicates. **d)** Flow cytometry histograms of  
 52 optoWnt hESCs expressing eGFP reporter for BRA/T after 24 hr illumination at varying light  
 53 intensities. Graph shows sum of n = 3 replicates.

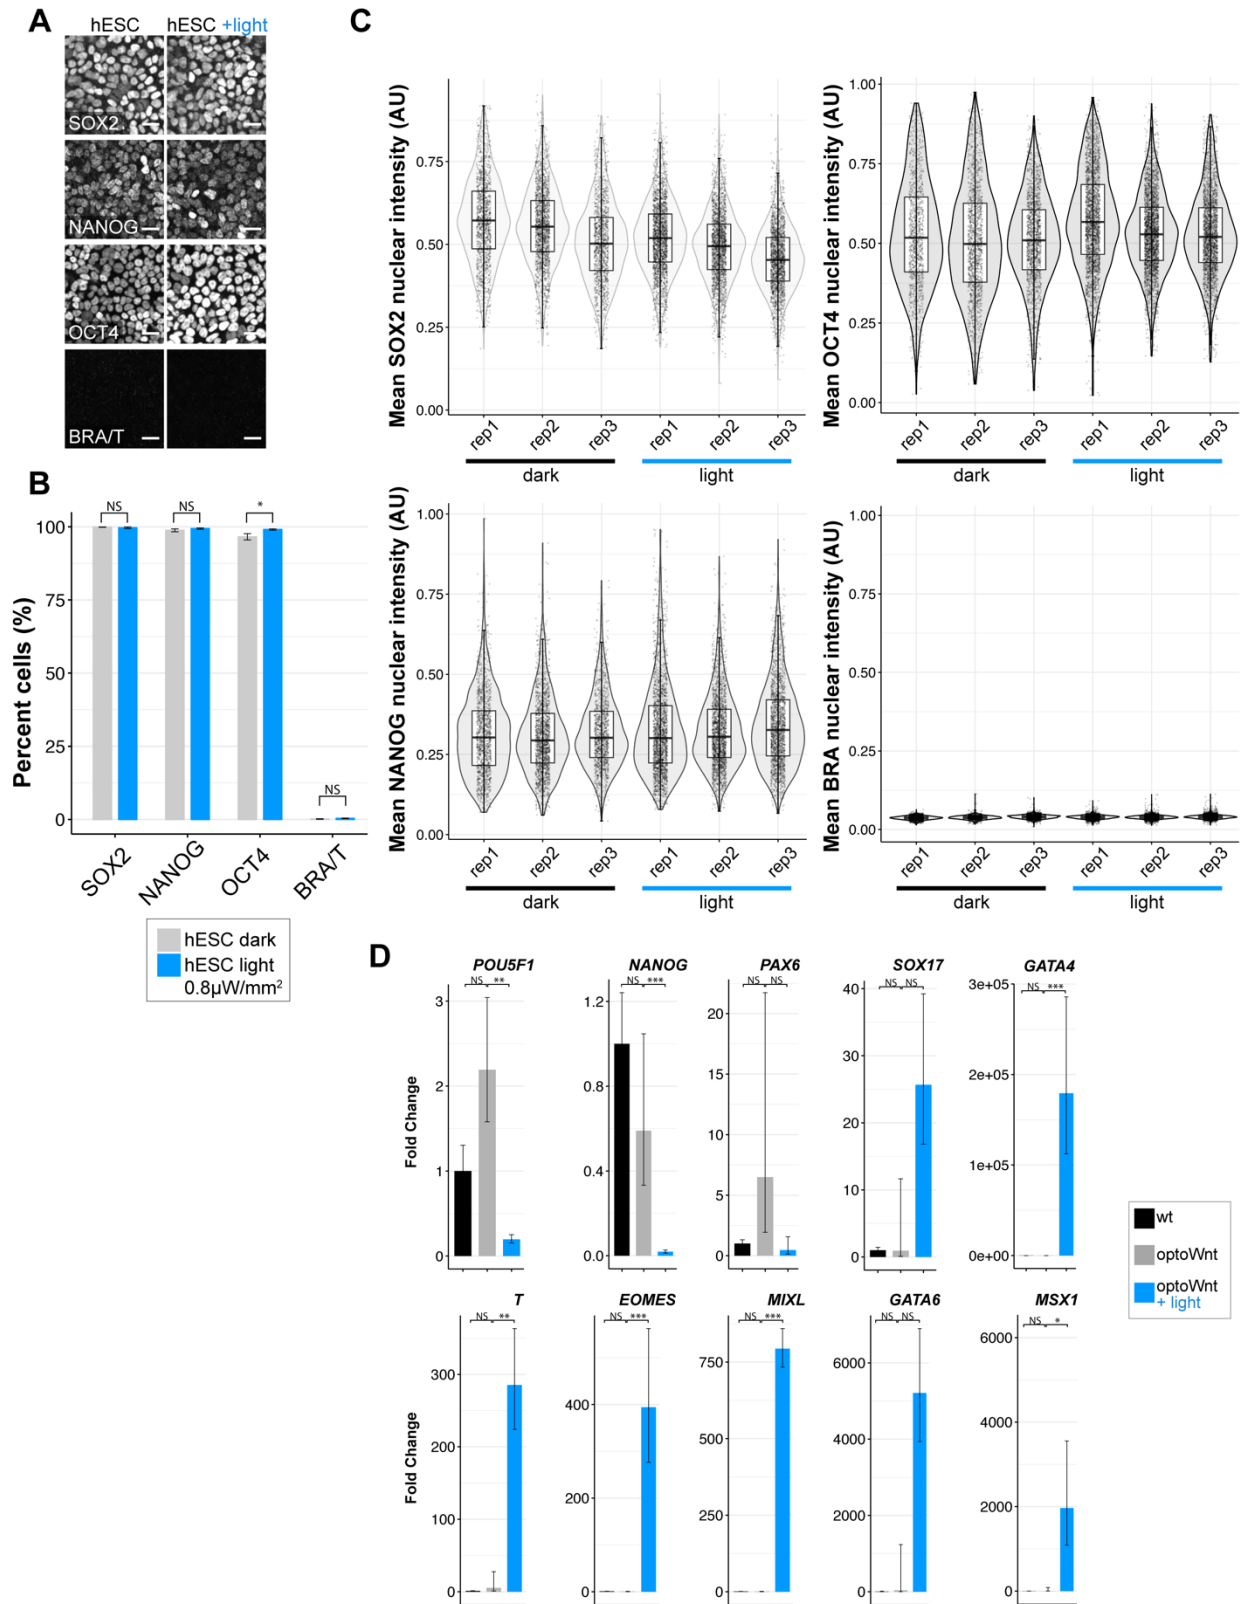

56 during continuous optogenetic stimulation of hESC cultures. Related to Figure 3. **a)**  
57 Representative fluorescence images of wild-type hESCs stained for cell fate markers SOX2,  
58 NANOG, OCT4, and BRA after 48 hrs illumination at  $0.8 \mu\text{W}/\text{mm}^2$ . Scale bar  $25 \mu\text{m}$ . **b)**  
59 Quantification of images shown in (a). Student's t-test (two-tail). Graph shows mean  $\pm 1$  s.d.,  $n =$   
60 3 biological replicates. **c)** Intensity distribution of pluripotency and differentiation markers shown  
61 in (a). Graph shows mean nuclear intensity of indicated marker for each biological replicate  
62 (rep1-rep3). Each point corresponds to single cell. **d)** qPCR analysis of wild-type and optoWnt  
63 cells shows no detectable spontaneous cell differentiation in unilluminated optoWnt cells.  
64 Graphs show mean fold change  $\pm 1$  s.d.,  $n = 3$  biological replicates. ANOVA followed by Tukey  
65 test.

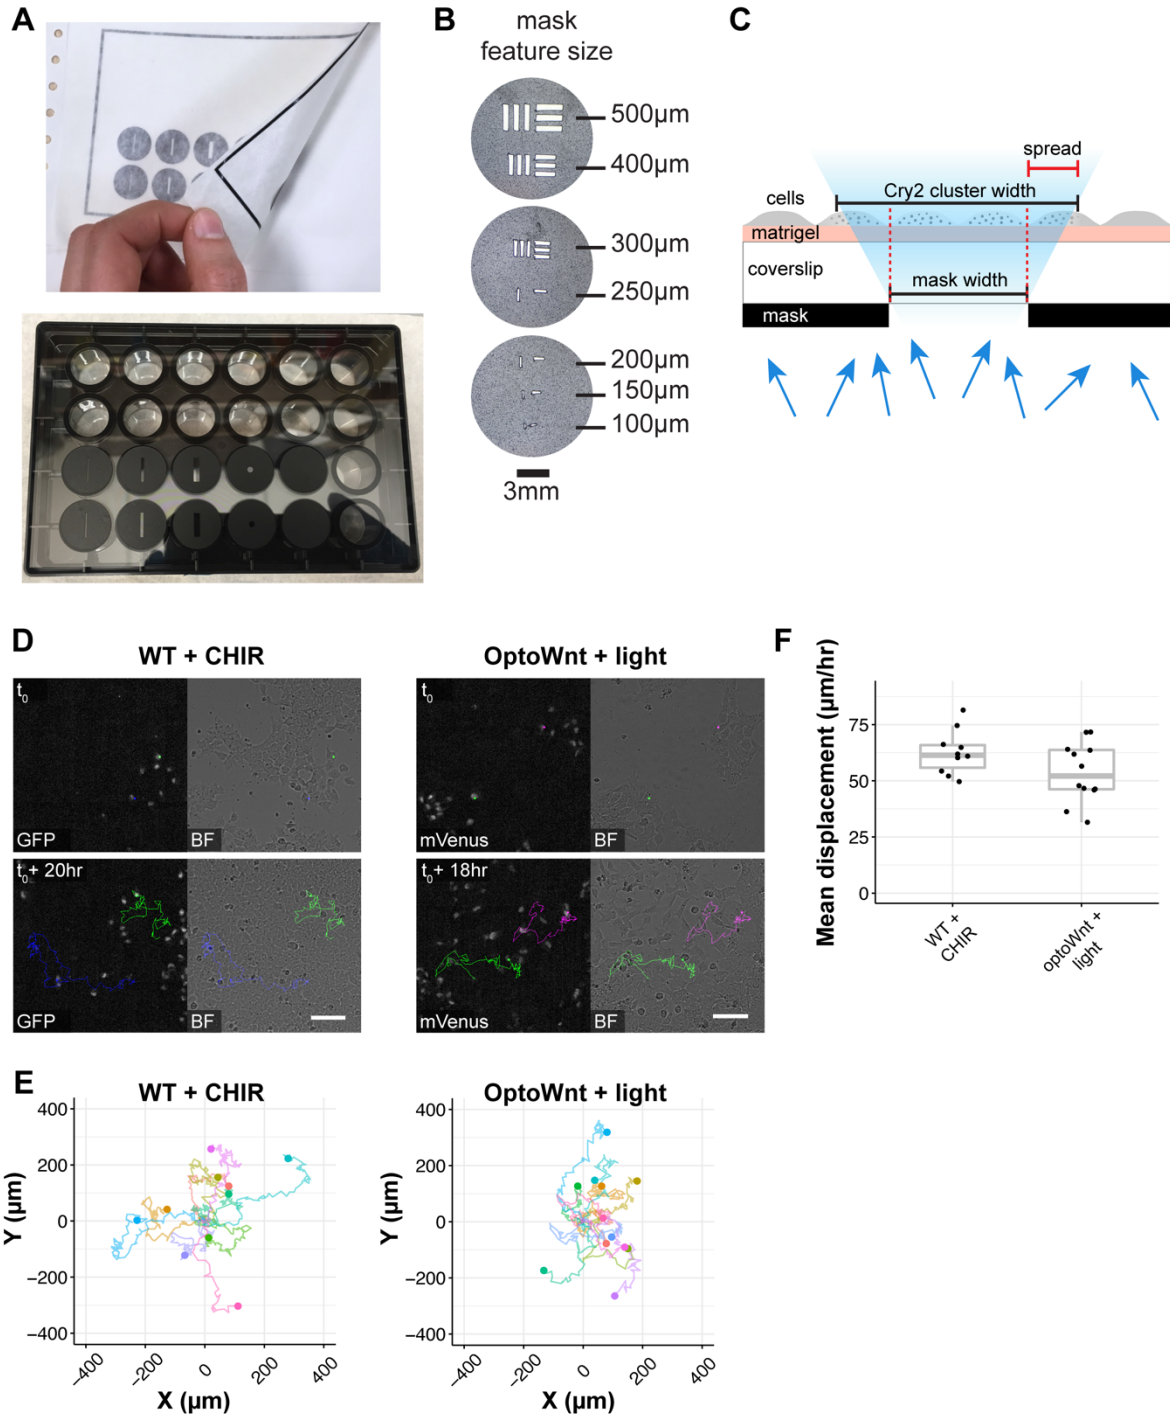

66  
67  
68  
69  
70  
71  
72  
73

**Supplementary Figure S7.** Spatial control of illumination and single-cell migration tracking during Wnt activation. Related to Figure 6. **a)** Images of adhesive die-cut masks applied using transfer tape (top) onto 24-well TC plate (bottom). **b)** Brightfield images of die-cut mask illustrate resolution limit of die cutter. Scale bar 3 mm. **c)** Schematic of light scattering from photomask. **d)** Representative images of hESC cell migration during Wnt activation. Images at the start of migration timecourse (top) and after the indicated time interval (bottom) are displayed with an overlay of single-cell migration track. Wnt activation was achieved with CHIR treatment of wild-

74 type cells ( $3 \mu\text{M}$ , left) or light stimulation of optoWnt cells (right). Cell tracking was started 24 hrs  
75 after initial CHIR treatment or light stimulation ( $t_0 = 24 \text{ hrs}$ ). Brightfield (BF) images show the  
76 entire cell population within the field of view, with the sparse fluorescent subpopulation used for  
77 cell tracking ( $\sim 10\%$  of total cells) visualized in the fluorescence channel (GFP+ wild-type  
78 hESCs, mVenus+ optoWnt hESCs). Scale bar  $100 \mu\text{m}$ . See also Supplementary Videos 2-3. **e)**  
79 Single-cell migration trajectories from timecourses displayed in (a). Each color represents  
80 individual cell trajectory ( $n=10$  wild-type+CHIR,  $n=11$  optoWnt+light). **f)** Quantification of mean  
81 cell displacement for trajectories shown in (e). Total cell displacement ( $\mu\text{m}$ ) was normalized to  
82 trajectory duration (hr) for each tracked cell. Each point represents single cell.

83 **Supplementary Table 1.** Primary antibodies used for immunostaining. Related to Figures 4 - 6.

| <b>Antigen</b>   | <b>Species</b> | <b>Antibody</b> | <b>Concentration</b> | 84 |
|------------------|----------------|-----------------|----------------------|----|
| <b>LRP6</b>      | Rbt            | Ab134146        | 1:1000               | 85 |
| <b>BRA</b>       | Rbt            | Sc20109         | 1:500                | 86 |
| <b>β-CATENIN</b> | Rbt            | Cell sig 8480   | 1:500                | 87 |
| <b>SLUG</b>      | Rbt            | Cell sig 9585   | 1:500                | 88 |
| <b>OCT4</b>      | Ms             | Sc5279          | 1:500                | 89 |
| <b>SOX2</b>      | Rbt            | Ab97959         | 1:500                | 90 |
| <b>NANOG</b>     | Ms             | Ab62734         | 1:500                | 91 |
|                  |                |                 |                      | 92 |
|                  |                |                 |                      | 93 |
